# Supplementary material for: Emerging Direct Targeting β-Catenin Agents
Source: MDPI journal article supplement (doi:10.3390/molecules27227735), 2022-11-10
Supplement: s1 [file s1]

**Table S1.** Biological assays used to evaluate the  $\beta$ -catenin activity.

| Entry  | Compd             | Assay                                                                                                                                                         |
|--------|-------------------|---------------------------------------------------------------------------------------------------------------------------------------------------------------|
| 1      | FH535             | TOPFLASH luciferase activity                                                                                                                                  |
| 2      | GW9662            | TOPFLASH luciferase activity                                                                                                                                  |
| 3–6    | FH535 analogs     | Luciferase-based TOPFlash assay                                                                                                                               |
| 7      | MSAB              | TOP-Luc activity assay                                                                                                                                        |
| 8–9    | MSAB analog       | TOPFlash assay                                                                                                                                                |
| 10     | LF3               | AlphaScreen                                                                                                                                                   |
| 11     | LF3 analog        | AlphaScreen                                                                                                                                                   |
| 12–14  | iCRTs             | Coimmunoprecipitation (coIP)                                                                                                                                  |
| 15     | ZINC02092166      | Wnt-responsive luciferase reporter assay                                                                                                                      |
| 16,17  | ZINC analogs      | Wnt-responsive luciferase reporter assay                                                                                                                      |
| 18     | PNU-74654         | ITC, NMR, Luciferase reporter system for Tcf-4 transactivation                                                                                                |
| 19     | UU-T01            | AlphaScreen, fluorescence polarization (FP)                                                                                                                   |
| 20, 21 | UU-T02/03         | Fluorescence polarization (FP)                                                                                                                                |
| 22     | HI-B1             | $\beta$ -catenin/TCF4 luciferase activity                                                                                                                     |
| 23–26  | PKF               | Tcf4 fragment (residues 8–54) fused to glutathione-S-transferase (GST), anti-GST antibody, and alkaline phosphatase (AP)-conjugated secondary antibody        |
| 27     | Henryin           | Purified recombinant proteins $\beta$ -catenin and TCF4 (0.5 $\mu$ g) were incubated with Henryin                                                             |
| 28     | BC21              | FP-based assay developed for that purpose (unpublished data)                                                                                                  |
| 29,30  | StAx-35, StAx-35R | Pull down assay. Competitive binding to Immobilized GST-tagged CBD of TCF4(1–52).                                                                             |
| 31     | Carnosic acid     | His-HD2 to glutathione S-transferase (GST)-ARD (immobilized on glutathione-coated microplates),                                                               |
| 32     | Pyrrolidinio      | Alpha screen, ITC                                                                                                                                             |
| 33     | hsBCL9CT-24       | LEF/TCF reporter assay robust ALPHA competition assays were developed to determine the potency of inhibitors in disrupting the $\beta$ -cat/BCL9 interaction. |

**Table S2.** Summary of the activities of compounds 1–33.

| Comp  | Label        | Assay                                                                                                                                                                                                                                                 |
|-------|--------------|-------------------------------------------------------------------------------------------------------------------------------------------------------------------------------------------------------------------------------------------------------|
| 1     | FH535        | Low micromolar LC <sub>50</sub> values as Inhibitors of colon, lung and liver carcinomas expressing high or active Wnt/b-catenin, antagonist of PPAR $\alpha$ and PPAR.                                                                               |
| 2     | GW9662       | Specific PPAR $\alpha$ antagonistic, unable to antagonize PPAR $\alpha$ and to inhibit the Wnt/ $\beta$ -catenin pathway.                                                                                                                             |
| 3     | FH535 analog | Superior to FH535 in the [ <sup>3</sup> H]-thymidine incorporation assay, weak activity in the TOPFlash assay.                                                                                                                                        |
| 6     | FH535 analog | Weak activity in the [3H]-thymidine incorporation assay, comparable to FH535 in the TOPFlash assay.                                                                                                                                                   |
| 7     | MSAB         | Decreased cell viability of Wnt-dependent HCT116, HT115 and H23 cells; inhibited tumor growth in xenograft mice model after 2 weeks treatment at 10–20 mg/kg.                                                                                         |
| 8–9   | MSAB analogs | Inhibition of Wnt reporter with an IC <sub>50</sub> value of 7.0 $\mu$ M, reduction the c-Myc levels, inhibition of HCT116 with IC <sub>50</sub> of 20.2 $\mu$ M.                                                                                     |
| 10    | LF3          | IC <sub>50</sub> of 1.65 and 1.82 $\mu$ M in the AlphaScreen and ELISA assays.                                                                                                                                                                        |
| 11    | LF3 analog   | Showed inhibitory activity as potent as that of LF3 in the AlphaScreen and ELISA assays.                                                                                                                                                              |
| 12–14 | iCRTs        | Selective disruption $\beta$ -catenin/Tcf4 interactions; efficacy comparable with 5-FU in human CRC                                                                                                                                                   |
| 15    | ZINC02092166 | Inhibition the TOPFlash luciferase activity in pcDNA3.1- $\beta$ -catenin transfected HEK293 and SW480 cells (IC <sub>50</sub> of 0.86 and 0.71 $\mu$ M); SW480, HCT116, and HT29 cell growth inhibition with low micromolar IC <sub>50</sub> values. |
| 16,17 | ZINC analog  | Similar to that of ZINC02092166 In the AlphaScreen and FP assays.                                                                                                                                                                                     |
| 16,17 | ZINC analog  | IC <sub>50</sub> of 26 $\mu$ M in the TOPFlash and FOPFlash luciferase reporter assay; i SW480 and HCY116 cancer cell growth inhibition with IC <sub>50</sub> of 2.0 and 31 M.                                                                        |
| 18    | PNU-74654    | Kd of 450 nM in direct binding ITC experiments; specific inhibition for Tcf-4 transactivation in the cellular luciferase reporter system.                                                                                                             |
| 19    | UU-T01       | Ki of 3.14 $\mu$ M as disruptor of $\beta$ -catenin/Tcf interactions. ITC, Kd of 0.531 $\mu$ M to WT -catenin, AlphaScreen Ki of 7.60 $\mu$ M                                                                                                         |
| 20    | UU-T02       | Ki value of 1.32 $\mu$ M against the WT $\beta$ -catenin; complete disruption of the $\beta$ -catenin/Tcf PPI.                                                                                                                                        |
| 21    | UU-T03       | IC <sub>50</sub> of 28.7 mM in SW480 cells and IC <sub>50</sub> of 37.6 $\mu$ M in Wnt-activated HEK293 cells in the Wnt-responsive luciferase reporter assay.                                                                                        |
| 22    | HI-B1        | $\beta$ -catenin/Tcf4 interaction inhibition in vitro in DLD-1 and Caco-2 cell lines; Reduction of growth of a PDX colon cancer with a high expression level of $\beta$ -catenin.                                                                     |
| 23–25 | PKF          | Inhibition of Tcf4/ $\beta$ -catenin association IC <sub>50</sub> values of 2, 4, 0.8 and 0.64 mM, respectively.                                                                                                                                      |
| 26    | PKF          | In MM blocked expression of Wnt target genes and induced cytotoxicity, In xenograft models of hMM, inhibited tumor growth and prolonged survival.                                                                                                     |
| 27    | Henryrn      | Reduced the expression of Cyclin D1 and c-Myc, and induced G1/S phase arrest in HCT116 cells by impairing the association of $\beta$ -catenin/Tcf4.                                                                                                   |
| 28    | BC21         | Inhibitor of the $\beta$ -catenin/Tcf4 driven luciferase activity. Decreased the HCT116 cell viability; at 5 $\mu$ M inhibited >80% colony forming activities                                                                                         |

|              |                      |                                                                                                                                                 |
|--------------|----------------------|-------------------------------------------------------------------------------------------------------------------------------------------------|
| <b>29,30</b> | StAx-35,<br>StAx-35R | Both fStAx-35 and -35R suppressed luciferase activity. Proliferation of DLD1 and SW480 cells was blocked by aStAx-35R.                          |
| <b>31</b>    | Carnosic acid        | inhibited the binding of $\beta$ -catenin to BCL9 in vitro, and $\beta$ -catenin-dependent transcription in CRC cell                            |
| <b>32</b>    | Pyrrolidinio         | Selectively disruption $\beta$ -catenin/BCL9 in cells overexpressing the Wnt signaling with IC <sub>50</sub> values in the low micromolar range |
| <b>33</b>    | hsBCL9CT-24          | Kd value of 4.21 nM In the HTRF binding assay. Kd value of 4.73 nM in disrupting the $\beta$ -catenin/BCL9 interaction.                         |
